# Supplementary material for: Applicability and prognostic value of frailty assessment tools among hospitalized patients with advanced chronic liver disease
Source: PubMed Central journal article supplement (PMC7976891; doi:10.3325/cmj.2021.62.8), 2021-02
Supplement: CroatMedJ_62_s002.pdf [file CroatMedJ_62_s002.pdf]

## Supplementary Table 1

Table S1.

Frailty as a predictor of mortality in selected patient subgroups, a sensitivity analysis\*

| <i>Subgroup</i>                                  | HR   | 95%CI      | P value |
|--------------------------------------------------|------|------------|---------|
| <i>Frailty assessment tool &amp; cut-off</i>     |      |            |         |
| <i>Liver frailty index &gt;5.4</i>               |      |            |         |
| not infected                                     | 3,7  | 1.52-9.34  | 0,005   |
| infected                                         | 4,96 | 2.46-10.28 | <0.001  |
| non-ALD                                          | 16,8 | 4.49-65.12 | <0.001  |
| ALD†                                             | 4,89 | 2.72-8.97  | <0.001  |
| MELD≤20                                          | 5,03 | 2.29-11.31 | <0.001  |
| MELD>20                                          | 5,18 | 2.32-11.62 | <0.001  |
| <i>Clinical frailty scale &gt;4</i>              |      |            |         |
| not infected                                     | 4,45 | 1.76-11.52 | 0,002   |
| infected                                         | 3,84 | 1.85-8.02  | <0.001  |
| non-ALD                                          | 7,03 | 2.03-24.37 | 0,002   |
| ALD                                              | 5,5  | 3.07-10.09 | <0.001  |
| MELD≤20                                          | 3    | 1.21-7.34  | 0,016   |
| MELD>20                                          | 5,56 | 2.63-12.16 | <0.001  |
| <i>Fried frailty score &gt;3</i>                 |      |            |         |
| not infected                                     | 1,75 | 0.61-4.97  | 0,3     |
| infected                                         | 4    | 2.05-7.97  | <0.001  |
| non-ALD                                          | 1,99 | 0.64-6.87  | 0,28    |
| ALD                                              | 4,5  | 2.54-8.18  | <0.001  |
| MELD≤20                                          | 2,71 | 1.19-6.26  | 0,021   |
| MELD>20                                          | 4,08 | 1.88-8.94  | <0.001  |
| <i>Short performance physical battery test≤4</i> |      |            |         |
| not infected                                     | 1,83 | 0.57-5.69  | 0,3     |
| infected                                         | 4,62 | 2.28-9.32  | <0.001  |
| non-ALD                                          | 4,94 | 1.42-17.38 | 0,013   |
| ALD                                              | 4,25 | 2.91-7.87  | <0.001  |
| MELD≤20                                          | 2,57 | 0.97-6.62  | 0,051   |
| MELD>20                                          | 3,35 | 1.64-7.12  | 0,002   |

\*Competing events analysis for death during follow-up

† ALD: alcoholic liver disease
